# Supplementary figures and images for: Increasing human motor skill acquisition by driving theta–gamma coupling
Source: eLife journal article supplement (doi:10.7554/elife.67355), 2021-11-23

A

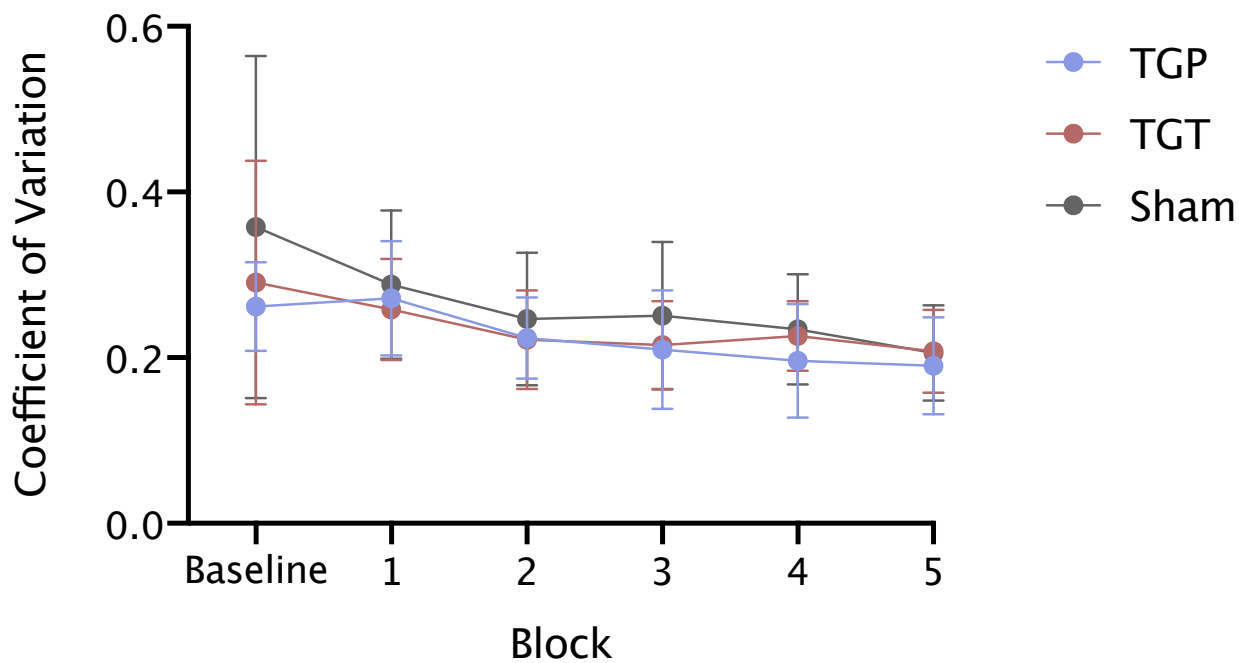

B

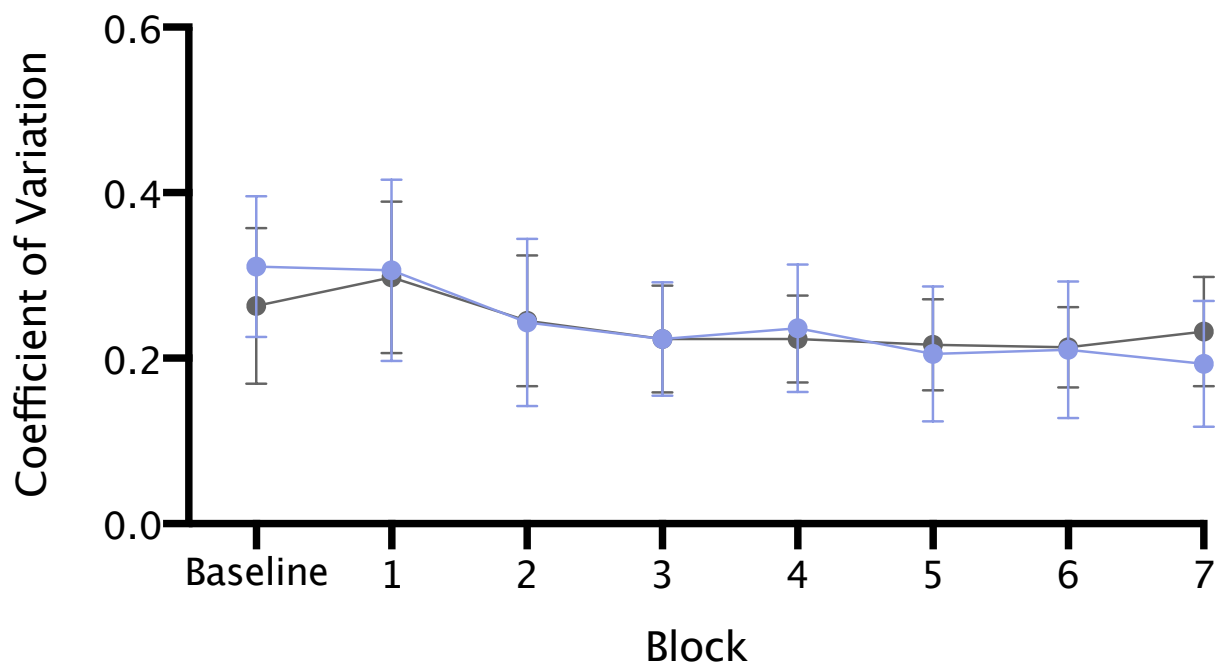

Supplement: supp [file elife_poa_e67355_Figure_2_figure_supplement_1.pdf › elife_poa_e67355_Figure_2_figure_supplement_1.pdf]
